# Supplementary material for: The use of peanut shells as a bio-template to prepare K-doped In2O3 porous sheets for chlorine detection
Source: Royal Society of Chemistry journal article supplement (doi:10.1039/d4ra05208k), 2024-01-01
Supplement: d4ra05208k1.pdf [file d4ra05208k1.pdf]

## Supplementary Information

The use of peanut shells as a bio-template to prepare K-doped  $\text{In}_2\text{O}_3$   
porous sheets for chlorine detection

Lin Zhu <sup>a,\*</sup> Heyong Han <sup>b</sup>

---

<sup>a,\*</sup> School of Materials Science and Engineering, Taiyuan University of Science and Technology, Taiyuan, 030024, China. E-mail:

tyustcl@126.com

<sup>b</sup> School of Mechanical Engineering, Taiyuan University of Science and Technology, Taiyuan, 030024, China

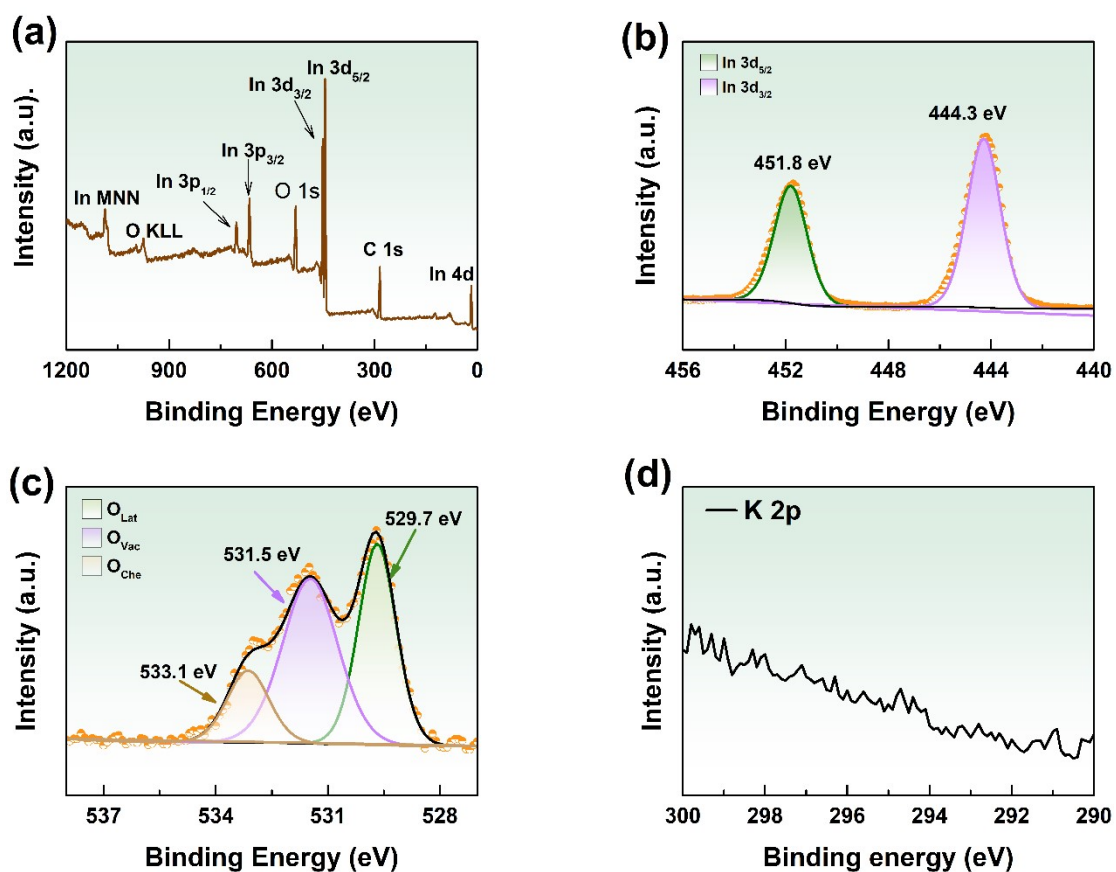

Fig. S1 XPS survey spectra of the pure  $\text{In}_2\text{O}_3$ : (a) fully scanned spectra, (b) In 3d, (c) O 1s, (d) K 2p.

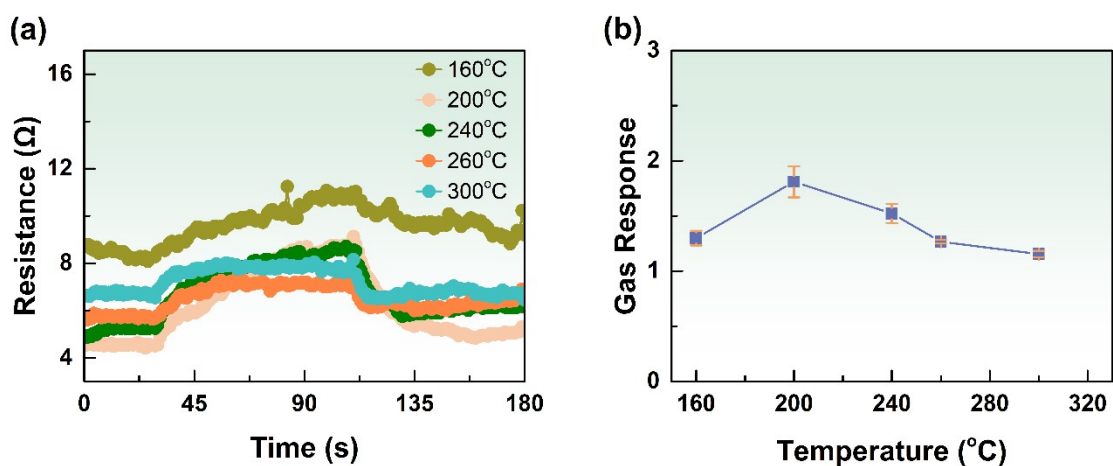

Fig. S2 (a) Dynamic resistance curves and (b) gas response to 0.5 ppm  $\text{Cl}_2$  at various working temperature of the pure  $\text{In}_2\text{O}_3$  sensor.
